# Supplementary material for: Morphology and cytochemical patterns of peripheral blood cells of tiger frog (Rana rugulosa)
Source: PeerJ. 2022 Aug 29;10:e13915. doi: 10.7717/peerj.13915 (PMC9435520; doi:10.7717/peerj.13915)
Supplement: File S1 — Twenty of each type of blood cells were randomly selected from each frog to measure size and then the standard deviation was calculated. [file peerj-10-13915-s001.xlsx]

## Sheet: Sheet1
Cell length and width of female tiger frog
Erythrocytes		(nuclei)		Neutrophils		Eosinophils		Basophils		Monocytes		Large lymphocytes		Small lymphocytes		Thrombocytes
Length	Width	Length	Width	Length	Width	Length	Width	Length	Width	Length	Width	Length	Width	Length	Width	Length	Width
17.7	14.584	5.292	4.704	16	13.5	13.76	11.17	9.4	8.2	20.4	13.8	12.1	11.1	6.3	5.5	18.4	4.64
15.876	8.82	5.88	4.116	15.47	11.81	14.48	10.91	9.02	8.17	24.1	17.1	11.28	10.74	7.11	6.16	15.17	3.91
13.524	9.996	5.292	4.704	12.5	10.15	13.16	12.32	9.15	8.79	22.11	15.41	10.95	9.86	6.64	6.27	18.46	4.53
14.112	9.408	5.88	4.704	17.1	14.12	14.12	10.8	8.07	7.19	21.71	15.07	11.7	8.82	6.93	5	16.76	4.61
12.348	8.232	5.292	4.116	18.04	15.08	13.8	12.21	10.09	8.95	24	17.36	11.31	10.47	7.16	6.67	17.81	4.24
13.524	9.996	4.704	4.116	17.89	14.16	14.26	11.87	11.71	8.76	23.14	18.11	9.1	7.31	8.6	6.94	18.41	3.01
15.876	10.584	5.292	4.998	16.14	13.55	15.21	10.68	10.52	9.19	18.4	17.71	8.79	7.25	7.63	6.85	14.01	4.6
13.524	11.172	5.88	4.704	18.82	14.4	13.71	12.34	9.74	8.21	21.7	18.39	9.61	8.13	7.58	6.14	19.23	4.17
14.7	10.584	5.292	4.116	17	10.13	13.94	11.38	9.07	7.94	17.6	15.57	10.95	9.83	7.41	7.1	14.54	3.58
18.936	11.996	4.704	3.528	14.1	11.22	13.46	10.09	7.79	6.54	24.3	17.41	9.5	8.16	5.99	4.78	20	4.32
14.406	9.408	5.292	4.116	17.73	13.61	14.37	12.46	7.41	6.01	18.14	16.91	10.18	9.93	6	5.05	17.83	4.64
15.524	8.82	5.292	4.41	16.56	14.25	13.32	11.85	8.13	6.47	23.18	18.22	9.01	8.53	5.88	5.13	17.1	4.41
15.288	10.584	4.704	3.528	19.38	15.27	13.54	10.74	9.33	8.46	25.79	19.14	11.8	9.51	7.3	6.45	16.4	3.78
13.524	9.996	4.998	4.41	18.09	12.01	13.29	11.16	9.03	7.67	23.2	18.99	8.62	7.9	6.8	5.27	17.18	3.86
16.7	13.17	5.88	5.292	16.37	11.9	13.45	10.08	9.43	8.32	24.6	17.67	8.95	7.75	7.91	6.29	18.26	4.65
15.172	11.32	5.88	5.292	17.6	13.98	12.98	10.76	10.08	8.86	25.66	18.64	11.42	9.03	6.6	5.51	21.43	4.27
16.348	11.172	6.468	4.704	12.53	9.12	14.07	11.39	10.31	9.05	24.38	18.55	12.9	9.27	7.92	7.66	21.4	4.05
14.112	9.996	5.292	4.116	17.1	14.12	13.36	11.07	8.69	7.51	23.45	18.91	10.83	9.19	7.85	6.57	18.8	4.57
14.7	9.408	5.292	4.704	11.56	9.55	13.84	11.71	9.15	7.25	23.8	17.39	12.22	10.53	7.34	6.96	17.31	4.32
15.876	12.82	4.998	4.116	10.55	9.82	13.07	10.18	9.57	8.28	22.42	17.57	10.2	9.54	8.68	7.75	18.01	4.37
15.0885	10.6033	5.3802	4.4247	16.0265	12.5875	13.7595	11.2585	9.2845	7.991	22.604	17.396	10.571	9.1425	7.1815	6.2025	17.8255	4.2265
1.22593	0.872145	0.456411	0.478372	2.61047	1.94347	2.97668	2.50216	2.19622	1.91094	2.30439	1.39785	1.26408	1.11569	0.786265	0.868475	1.89074	0.415804
Cell length and width of male tiger frog
Erythrocytes		(nuclei)		Neutrophils		Eosinophils		Basophils		Monocytes		Large lymphocytes		Small lymphocytes		Thrombocytes
Length	Width	Length	Width	Length	Width	Length	Width	Length	Width	Length	Width	Length	Width	Length	Width	Length	Width
12.936	9.986	7.644	5.88	14.9	12.1	13.23	11.17	9.2	7.5	21.1	17.1	9.9	9	7	6.4	16.7	5
15.524	11.916	7.644	5.292	14.5	9.11	13.79	10.91	9.17	8.28	21.41	13.8	10.17	9.18	6.19	5.11	17.34	4.76
12.936	9.408	7.056	5.88	14.1	8.22	14.67	12.32	10.06	9.52	20.95	14.44	8.32	7.42	7.47	6.84	14.57	5.72
14.112	8.82	7.056	5.292	14.96	9.04	14.18	10.8	9.98	8.05	21.07	15.69	8.06	7.2	7.22	6.92	15.8	4.28
17.7	10.584	6.468	5.88	18.23	16.8	15.09	12.21	8.25	7.34	24.63	18.45	11	9.14	7.9	6.57	14.71	5.07
14.7	9.996	7.644	5.292	17.75	12.09	13.26	11.87	9.77	8.56	25.24	19.86	10.06	8.51	8.32	7.11	15.09	4.14
14.112	9.408	7.644	4.998	17.32	13.92	14.06	10.68	10.59	9.66	24.73	18.4	9.44	8.31	5.95	5.01	17.7	4.37
15.876	8.232	8.232	5.292	19.34	16.31	15.19	12.34	9.43	8.19	24.73	17.36	8.42	8.06	8.93	8.01	17.67	3.84
16.464	8.232	7.644	5.88	10.6	9.29	14.29	11.38	7.47	6.57	21.71	18.39	11.83	10.27	6.21	5.71	16.13	4.22
15.288	8.82	9.408	5.292	11.03	10.17	13.71	10.09	6.4	5.98	25.91	20.4	10.16	9.74	8.73	7.15	15.25	4.95
13.524	9.996	9.408	5.292	17.7	15.11	17.08	12.46	6.9	6.01	23.95	19.77	9.46	9.24	7.88	6.74	19.41	4.56
17.7	10.996	8.82	4.998	11.1	10.7	14.01	11.85	7.51	6.94	24.27	18.77	11.6	9.36	7.85	7.13	17.79	4.38
14.112	8.82	9.996	5.292	14.63	11.48	13.25	10.47	9.38	8.24	25.31	17.95	9.86	8.43	6.94	5.57	15.41	5.26
13.524	9.996	10.584	6.468	11.42	10.05	14.18	11.16	9.06	8.14	20.11	18.81	11.12	8.38	6.55	5.82	19.04	4.21
15.732	12.584	9.996	5.88	13.77	11.52	13.25	10.08	9.21	8.57	23.76	17.75	11.81	10.23	5.76	5.44	17.61	4.74
14.112	9.408	10.584	5.88	16.95	14.4	15.37	10.78	10.86	9.35	21.86	18.59	9.72	8.53	6.12	5.48	18.36	5.66
13.377	10.584	9.408	5.586	14.6	21.11	12.23	11.39	8.7	7.24	26.93	16.6	9.89	9.06	9.73	8.6	19.63	5.1
12.348	9.996	7.644	5.292	12.49	10.53	12.54	11.07	6.8	6.18	20.77	17.23	9.66	8.32	6.87	5.95	18.11	4.95
13.524	8.82	8.82	5.586	13.6	8.8	12.98	11.71	8.3	7.16	20.63	16.91	10.13	8.46	7.95	6.44	19.27	4.23
14.7	9.996	9.408	5.88	11.24	9.82	12.01	10.18	7.9	6.36	21.46	17.65	9.47	8.93	7.08	6.32	21.54	5.07
14.6151	9.8299	8.5554	5.5566	14.5115	12.0285	13.9185	11.246	8.747	7.692	23.0265	17.696	10.004	8.7885	7.3325	6.416	17.3565	4.7255
1.47441	1.10264	1.21184	0.37072	2.61687	3.23242	3.17426	2.50276	2.22133	1.96824	2.05342	1.63422	1.04207	0.776107	1.0513	0.914086	1.84277	0.503413
