# Supplementary material for: Morphology and cytochemical patterns of peripheral blood cells of tiger frog (Rana rugulosa)
Source: PeerJ. 2022 Aug 29;10:e13915. doi: 10.7717/peerj.13915 (PMC9435520; doi:10.7717/peerj.13915)
Supplement: File S2 — 100 leukocytes were randomly selected from each frog to calculate the percentage of various leukocytes. The results were repeated three times each time. [file peerj-10-13915-s002.xlsx]

## Sheet: Sheet1
The percentage of leukocytes in female tiger frog (1000)							The percentage of leukocytes in male tiger frog (1000)
	①	②	③	Mean				①	②	③	Mean
neutrophil	194	159.7	162.8	172.167			neutrophil	201.9	196.6	220.1	206.2
eosinophil	70.8	79.81	83.93	78.18			eosinophil	117.2	109.5	79.6	102.1
basophil	29.8	26.61	21.45	25.95			basophil	22.8	16.8	16.3	18.6
monoccyte	149.2	117.9	109.4	125.5			monoccyte	179.1	148.8	154.5	160.8
large lymphocyte	257.5	273.8	304.1	278.467			large lymphocyte	247.5	205	236.5	229.667
small lymphocyte	298.5	334	318.2	316.9			small lymphocyte	228	323	292.7	281.233
The percentage of leukocytes in female tiger frog (100)							The percentage of leukocytes in male tiger frog(100)
	①	②	③	Mean	SD			①	②	③	Mean	SD
neutrophil(%)	19.4	15.97	16.28	17.2167	1.54903		neutrophil(%)	20.19	19.66	22.01	20.62	1.00641
eosinophil(%)	7.08	7.98	8.39	7.82	3.41772		eosinophil(%)	11.72	10.95	7.96	10.21	1.62175
basophil(%)	2.98	2.66	2.15	2.6	0.341793		basophil(%)	2.28	1.68	1.63	1.86	0.295334
monoccyte(%)	14.92	11.79	10.94	12.55	1.71139		monoccyte(%)	17.91	14.88	15.45	16.08	1.31476
large lymphocyte(%)	25.75	27.38	30.41	27.8467	1.93084		large lymphocyte(%)	24.75	20.5	23.65	22.9667	1.80108
small lymphocyte(%)	29.85	33.4	31.82	31.69	1.45219		small lymphocyte(%)	22.8	32.3	29.27	28.1233	3.96221
