# Supplementary material for: Morphology and cytochemical patterns of peripheral blood cells of tiger frog (Rana rugulosa)
Source: PeerJ. 2022 Aug 29;10:e13915. doi: 10.7717/peerj.13915 (PMC9435520; doi:10.7717/peerj.13915)
Supplement: File S3 — The erythrocyte (RBC), leukocyte (WBC) and thrombocytes (TC) counts were determined manually with the Neubauer chamber. The mean value was taken after three experiments, and then the standard deviation was calculated. [file peerj-10-13915-s003.xlsx]

## Sheet: Sheet1
①Blood cell proportion of female tiger frog					①Blood cell proportion of male tiger frog					②Blood cell proportion of female tiger frog					②Blood cell proportion of male tiger frog					③Blood cell proportion of female tiger frog					③Blood cell proportion of male tiger frog
Erythrocytes	Leukocytes	Thrombocytes	Sum		Erythrocytes	Leukocytes	Thrombocytes	Sum		Erythrocytes	Leukocytes	Thrombocytes	Sum		Erythrocytes	Leukocytes	Thrombocytes	Sum		Erythrocytes	Leukocytes	Thrombocytes	Sum		Erythrocytes	Leukocytes	Thrombocytes	Sum
56	1	1	58		43	1	1	45		86	2	0	88		40	1	0	41		54	2	1	57		51	1	2	54
70	3	0	73		78	6	2	86		52	2	1	55		47	2	1	50		66	1	0	67		46	3	0	49
48	2	1	51		55	1	3	59		50	1	0	51		87	1	3	91		48	2	1	51		53	1	0	54
28	1	0	29		32	0	1	33		64	2	1	67		48	1	0	49		61	1	0	62		34	1	2	37
21	0	1	22		31	1	1	33		30	1	0	31		56	2	1	59		85	2	1	88		65	0	1	66
52	2	1	55		52	2	0	54		50	1	1	52		70	0	4	74		56	1	1	58		56	2	1	59
67	3	0	70		42	0	2	44		44	1	1	46		68	2	2	72		74	5	0	79		71	5	0	76
57	1	0	58		59	2	1	62		62	3	2	67		62	2	1	65		33	0	1	34		47	3	1	51
48	0	1	49		43	1	0	44		55	1	0	56		56	3	0	59		65	2	0	67		35	1	0	36
78	5	1	84		45	0	3	48		71	3	1	75		67	1	3	71		72	1	3	76		65	1	1	67
E/S	L/S	T/S			E/S	L/S	T/S			E/S	L/S	T/S			E/S	L/S	T/S			E/S	L/S	T/S			E/S	L/S	T/S
0.965517	0.0172414	0.0172414	1		0.955556	0.0222222	0.0222222	1		0.977273	0.0227273	0	1		0.97561	0.0243902	0	0.9999		0.947368	0.0350877	0.0175439	0.9999		0.944444	0.0185185	0.037037	1
0.9565	0.0145	0.029	1		0.906977	0.0697674	0.0232558	1		0.945455	0.0363636	0.0181818	1		0.94	0.04	0.02	1		0.985075	0.0149254	0	1		0.938776	0.0612245	0	1.0001
0.9483	0.0517	0	1		0.932203	0.0169492	0	0.949153		0.980392	0.0196078	0	1		0.956044	0.010989	0.032967	1		0.941176	0.0392157	0	1		0.981481	0.0185185	0	1
0.965517	0.0344828	0	1		0.969697	0	0	0.969697		0.955224	0.0298507	0.0149254	1		0.979592	0.0204082	0	1		0.983871	0.016129	0	1		0.918919	0.027027	0.0540541	0.9999
0.954545	0	0	0.954545		0.939394	0.030303	0	0.969697		0.967742	0.0322581	0	1		0.949153	0.0338983	0	1		0.965909	0.0227273	0	1		0.984848	0	0	1
0.945455	0.0363636	0.0181818	1		0.962963	0.037037	0	1		0.961538	0.0192308	0.0192308	1		0.945946	0	0.0540541	0.9999		0.965517	0.0172414	0.0172414	0.9999		0.949153	0.0338983	0.0169492	1
0.957143	0.0428571	0	0.9999		0.954545	0	0.0454545	1		0.956522	0.0217391	0.0217391	1		0.944444	0.0277778	0.0277778	1		0.936709	0.0632911	0	0.9999		0.934211	0.0657895	0	1
0.982759	0.0172414	0	0.9999		0.951613	0.0322581	0	0.983871		0.925373	0.0447761	0.0298507	1		0.953846	0.0307692	0.0153846	0.9999		0.970588	0	0.0294118	1		0.921569	0.0588235	0.0196078	1
0.979592	0	0.0204082	1		0.977273	0.0227273	0	1		0.982143	0.0178571	0	1		0.949153	0.0508475	0	1		0.970149	0.0298507	0	1		0.972222	0.0277778	0	1
0.928571	0.0595238	0.0119048	1		0.9375	0	0.0625	0.9999		0.946667	0.04	0.0133333	1		0.943662	0.0140845	0.0422535	1.0001		0.947368	0.0131579	0.0394737	1		0.970149	0.0149254	0.0149254	1
0.95839	0.027391	0.00967361	1		0.948772	0.0231264	0.0153433	1		0.959833	0.0284411	0.0117261	1.0001		0.953745	0.0253165	0.0192437	1		0.961373	0.0251626	0.0103671	1		0.951577	0.0326503	0.0142573	1
①The blood cell counts of female tiger frog																Sum		♀Mean	Mean×5	(104/mm3)				Blood cell proportion of female tiger frog
1	4	0	1	2	1	1	2	0	3	1	1	1	0	2	1	21	①	23.3	116.5						①	②	③	Mean
2	1	3	0	1	2	0	1	1	2	0	1	2	0	1	0	17	②	29	145					E/S	0.9584	0.9598	0.9614	0.959867
3	3	1	1	1	2	1	0	2	1	2	1	2	1	2	1	24	③	30.6	153					L/S	0.0274	0.0284	0.0252	0.027
1	0	2	1	1	0	2	0	1	1	3	5	1	2	2	3	25		①	②	③	Mean	SD		T/S	0.0097	0.0117	0.0104	0.0106
1	2	0	1	0	3	1	0	1	3	2	0	1	0	1	2	18	Erythrocytes	1.12	1.39	1.47	1.32667	0.149741
2	0	2	1	3	1	1	1	0	2	1	0	2	0	2	0	18	Leukocytes	0.32	0.41	0.39	0.373333	0.0385861		Blood cell proportion of male tiger frog
0	2	1	0	2	1	2	3	1	0	2	3	0	1	3	2	23	Thrombocytes	0.18	0.17	0.16	0.17	0.00816497			①	②	③	Mean
2	3	4	2	4	1	2	0	3	1	0	2	4	6	0	1	35								E/S	0.9488	0.9537	0.9516	0.951367
3	1	1	1	2	2	0	1	4	3	1	3	2	1	3	2	30								L/S	0.0231	0.0253	0.0327	0.0270333
1	2	1	0	1	2	1	1	2	5	0	3	1	1	0	1	22								T/S	0.0153	0.0192	0.0143	0.0162667
															Mean	23.3
①The blood cell counts of male tiger frog																Sum		♂Mean	Mean×5	(104/mm3)					①		②		③		Mean
0	2	9	2	1	3	2	4	2	1	0	3	3	4	2	1	39	①	24.8	124					Erythrocytes	111.654		139.171		147.094		132.64
1	1	0	2	2	0	3	0	1	1	1	1	2	3	0	1	19	②	24.9	124.5					Leukocytes	3.1921		4.118		3.8556		3.7219
2	0	1	4	1	2	2	3	2	0	3	0	3	0	2	3	28	③	21.3	106.5					Thrombocytes	1.78245		1.6965		1.5912		1.69005
1	2	1	3	0	4	1	1	2	1	0	1	2	1	1	2	23		①	②	③	Mean	SD		♀104/mm3	23.3*5=116.5		29*5=145		30.6*5=153
2	1	1	1	4	1	0	1	2	2	1	1	3	1	3	2	26	Erythrocytes	1.17	1.19	1.01	1.12333	0.0805536		♂104/mm3	24.8*5=124		24.9*5=124.5		21.3*5=106.5
0	1	2	0	1	2	1	2	1	0	3	0	1	0	1	0	15	Leukocytes	0.29	0.32	0.35	0.32	0.0244949		Erythrocytes	117.651		118.736		101.345		112.577
1	3	0	1	2	1	2	1	0	2	1	1	0	3	0	1	19	Thrombocytes	0.19	0.24	0.15	0.193333	0.0368179		Leukocytes	2.8644		3.14985		3.48255		3.1656
6	3	2	2	1	6	0	2	3	0	1	0	3	5	1	0	35								Thrombocytes	1.8972		2.3904		1.52295		1.93685
1	1	0	1	0	4	1	3	0	3	4	1	2	0	2	1	24
3	3	2	3	2	1	0	1	1	0	0	1	1	0	0	2	20
															Mean	24.8
②The blood cell counts of female tiger frog																Sum
1	0	3	0	1	2	6	1	1	0	2	1	0	1	4	1	24
0	2	1	1	1	0	2	3	0	1	1	2	1	2	1	0	18
4	2	0	3	0	0	1	4	1	0	1	0	1	3	5	1	26
2	1	4	1	2	3	5	1	3	1	2	1	1	1	0	5	33
1	1	2	1	3	2	0	0	0	2	1	4	0	4	2	1	24
0	3	2	1	3	1	1	2	1	3	4	1	2	3	5	0	32
1	4	2	1	4	0	3	0	3	0	0	1	0	5	2	1	27
3	4	3	3	1	2	1	1	1	7	2	3	1	2	5	3	42
2	0	5	0	3	4	1	2	1	0	2	1	0	3	3	5	32
1	2	2	1	1	3	3	2	4	3	1	3	4	0	2	0	32
															Mean	29
②The blood cell counts of male tiger frog																Sum
3	1	1	2	1	4	0	0	1	2	1	0	1	3	3	1	24
1	1	2	1	0	1	2	1	1	0	2	3	1	0	1	0	17
1	0	3	1	1	1	0	1	0	1	2	1	0	2	2	0	16
3	2	1	0	4	2	1	3	0	1	1	2	3	1	0	2	26
0	1	3	3	1	3	4	2	2	5	0	4	2	3	1	3	37
2	1	0	2	0	1	2	0	1	4	0	2	0	1	2	0	18
1	3	4	1	2	1	3	1	3	0	3	0	1	0	3	5	31
3	0	3	0	1	4	3	0	0	2	3	2	0	2	3	0	26
1	1	1	1	4	3	4	2	1	3	0	1	0	1	0	3	26
2	1	0	2	1	4	2	3	4	2	1	2	3	0	1	0	28
															Mean	24.9
③The blood cell counts of female tiger frog																Sum
4	1	2	1	3	4	4	1	3	5	2	4	3	1	3	3	44
1	1	2	0	3	1	5	0	1	4	3	0	1	3	1	1	27
4	1	1	1	2	2	2	1	3	3	2	3	5	1	0	2	33
2	2	3	1	0	3	1	2	1	1	0	2	1	3	0	4	26
0	1	1	0	1	2	1	0	3	1	0	3	0	0	2	1	16
2	2	1	5	0	1	2	3	1	1	3	1	1	2	0	0	25
3	7	2	1	2	5	3	2	3	0	2	0	3	2	2	5	42
0	2	1	3	1	3	2	1	4	1	1	4	2	0	3	4	32
4	5	0	0	3	4	0	4	1	1	2	1	3	1	0	3	32
2	0	1	3	0	2	4	1	3	2	3	4	1	2	1	0	29
															Mean	30.6
③The blood cell counts of male tiger frog																Sum
0	0	1	1	2	0	0	1	2	1	1	0	1	3	1	0	14
1	1	3	0	1	3	2	3	1	0	2	1	0	1	1	2	22
1	1	1	2	1	0	0	2	0	1	2	0	0	4	3	0	18
2	1	0	0	4	2	2	3	1	1	1	2	1	0	0	3	23
4	0	2	2	1	0	3	1	1	1	3	1	4	2	0	0	25
0	2	3	2	0	4	2	0	1	1	2	2	3	0	1	4	27
1	1	1	0	2	0	1	1	2	0	0	2	1	0	3	0	15
3	1	0	3	2	2	1	0	2	1	1	2	3	1	2	1	25
1	3	2	1	2	1	1	2	1	0	1	2	2	1	1	0	21
1	0	2	0	1	2	2	1	1	5	0	3	1	1	2	1	23
															Mean	21.3
